# Supplementary material for: Reducing Suicidal Ideation Through Insomnia Treatment (REST-IT): A Randomized Clinical Trial
Source: Atypon-hosted journal article supplement (doi:10.1176/appi.ajp.2019.19030267), 2019-09-20
Supplement: appi.ajp.2019.19030267.ds001.pdf [file appi.ajp.2019.19030267.ds001.pdf]

Online supplement for McCall et al., Reducing Suicidal Ideation Through Insomnia Treatment (REST-IT): A Randomized Clinical Trial. Am J Psychiatry (doi: 10.1176/appi.ajp.2019.19030267)

Table S1. Correlations between C-SSRS suicidal ideation subscale and the Beck Scale for Suicide ideation

| Visit    | N=  | Pearson's r | P<     |
|----------|-----|-------------|--------|
| Baseline | 103 | 0.34        | 0.001  |
| Week 1   | 100 | 0.50        | 0.0001 |
| Week 2   | 96  | 0.64        | 0.0001 |
| Week 4   | 89  | 0.60        | 0.0001 |
| Week 6   | 85  | 0.70        | 0.0001 |
| Week 8   | 83  | 0.64        | 0.0001 |
